# Supplementary material for: Gendoo: Functional profiling of gene and disease features using MeSH vocabulary
Source: PubMed Central journal article supplement — Nucleic Acids Res. 2009 Jun 4;37(Web Server issue):W166–9. doi: 10.1093/nar/gkp483 (PMC2703956; doi:10.1093/nar/gkp483), 2009-06-04

# Gendoo: Functional profiling of gene and disease features using MeSH vocabulary

Supplementary Figure S1 - Schematic view of the pipeline for generating pairs of OMIM entries and relevant MeSH terms

The pipeline consists of three steps. First, PubMed IDs (PMIDs) cited in the OMIM reference section are collected (a). Next, OMIM IDs described in the abstracts of MEDLINE articles are extracted (b). Then, PMIDs are retrieved by searching PubMed by inputting abbreviation/long-form pairs of disease names (c). After these steps, we generate OMIM-MeSH pairs by extracting assigned MeSH terms from the retrieved articles.

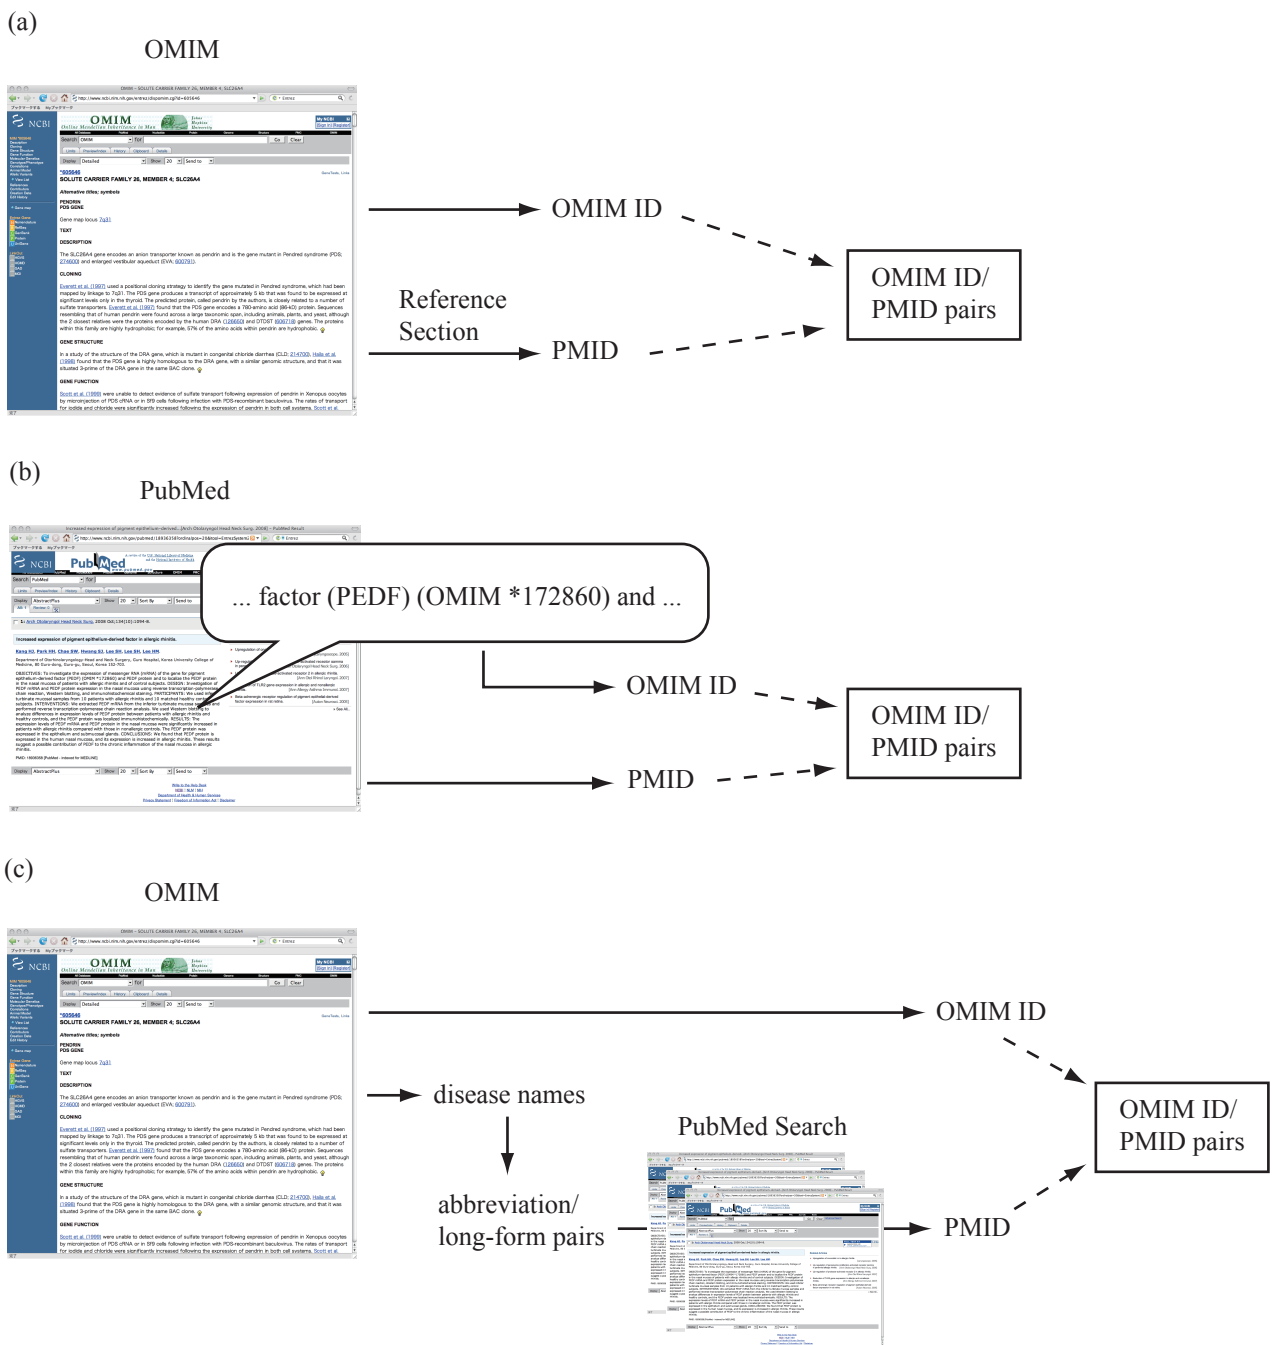

Supplement: gkp483_1.pdf [file gkp483_1.pdf]
